# Supplementary material for: Study of anthropogenic emissions in the life cycle of Body in White manufactured in new generation steels
Source: Research Square preprint supplement (doi:10.21203/rs.3.rs-3324737/v1), 2023-09-09
Supplement: Supplementary file 1 [file 12bc2b76b537a4c1a37c043c.docx]

**Highlights**

- A 2.65% reduction in vehicle mass resulted in a decrease of 0.11 tonnes of greenhouse gases.
- There is a reduction in the total GHG emission of 2.04% during the complete life cycle of the vehicles;
- The vehicle's fuel consumption was reduced by 0.78 ℓ/100 km from the 28 kg mass reduction;
- Reduction in vehicle weight plays a significant role in reducing GHG;
- Providing a mitigation factor for global warming.
